# Supplementary material for: Cell‐free DNA fetal fraction in twin gestations in single‐nucleotide polymorphism‐based noninvasive prenatal screening
Source: PubMed Central journal article supplement (PMC7027570; doi:10.1002/pd.5609), 2019-11-21

# Supplement Figure 1

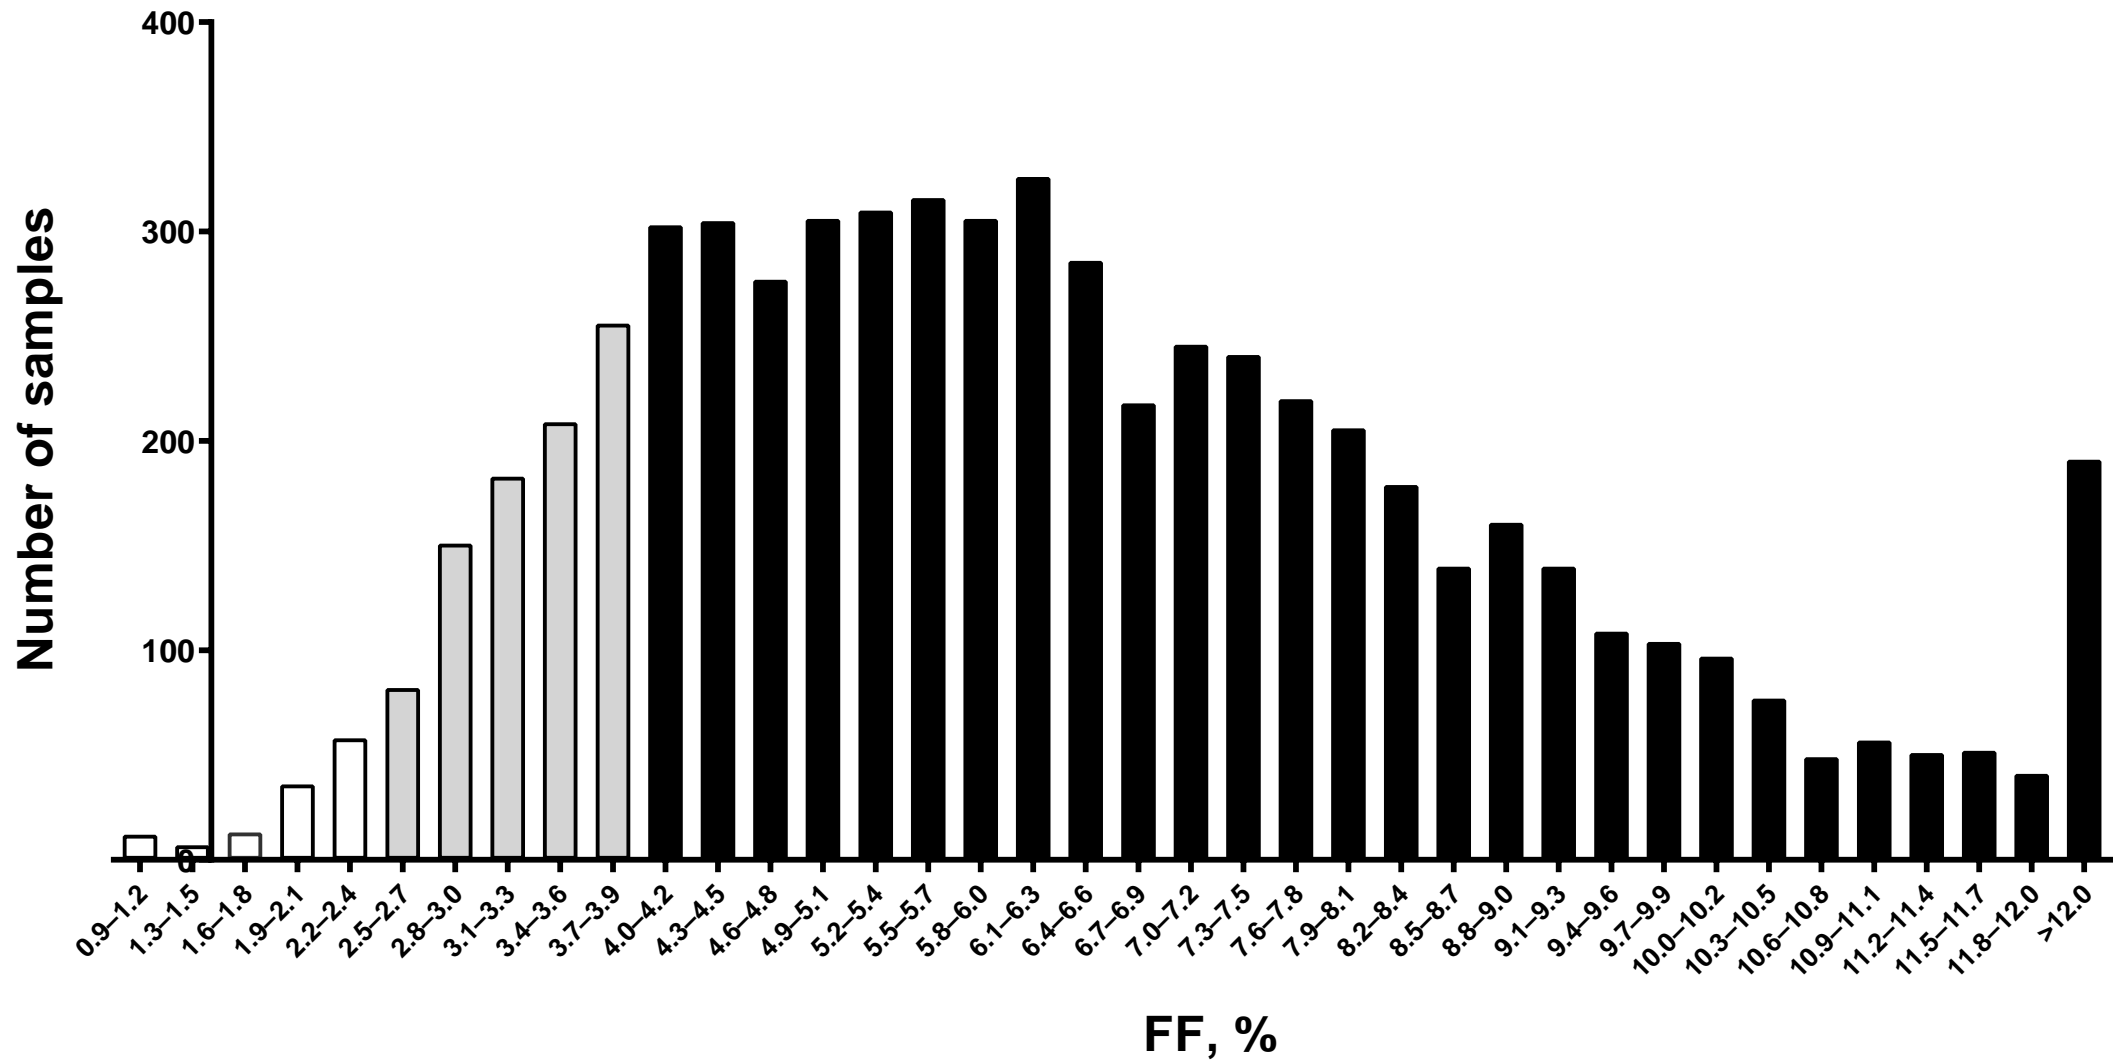

Supplement: PD-40-179-s001.pdf [file PD-40-179-s001.pdf]
